1  
2  
3  
4  
5  
6  
7  
8  
9  
10  
11  
12  
13  
14  
15  
16  
17  
18  
19  
20  
21  
22  
23  
24  
25

MicrobiomeGWAS: a tool for identifying host genetic variants associated with microbiome composition

Xing Hua, Lei Song, Guoqin Yu, James J. Goedert,  
Christian C. Abnet, Maria Teresa Landi, Jianxin Shi

Division of Cancer Epidemiology and Genetics, National Cancer Institute, National Institute of Health,  
Bethesda, Maryland

Correspondence to:

Jianxin Shi, PhD

Biostatistics Branch, Division of Cancer Epidemiology and Genetics, National Cancer Institute, NIH

9609 Medical Center Drive, 7E596, Bethesda, MD 20892

Tel: (240) 276-7419

Email: [Jianxin.Shi@nih.gov](mailto:Jianxin.Shi@nih.gov)

26  
27  
28  
29  
30  
31  
32  
33  
34  
35  
36  
37  
38  
39  
40  
41  
42  
43  
44  
45  
46  
47  
48  
49  
50

## Abstract

The microbiome is the collection of all microbial genes and can be investigated by sequencing highly variable regions of 16S ribosomal RNA (rRNA) genes. Evidence suggests that environmental factors and host genetics may interact to impact human microbiome composition. Identifying host genetic variants associated with human microbiome composition not only provides clues for characterizing microbiome variation but also helps to elucidate biological mechanisms of genetic associations, prioritize genetic variants, and improve genetic risk prediction. Since a microbiota functions as a community, it is best characterized by beta diversity, that is, a pairwise distance matrix. We develop a statistical framework and a computationally efficient software package, microbiomeGWAS, for identifying host genetic variants associated with microbiome beta diversity with or without interacting with an environmental factor. We show that score statistics have positive skewness and kurtosis due to the dependent nature of the pairwise data, which makes *P*-value approximations based on asymptotic distributions unacceptably liberal. By correcting for skewness and kurtosis, we develop accurate *P*-value approximations, whose accuracy was verified by extensive simulations. We exemplify our methods by analyzing a set of 147 genotyped subjects with 16S rRNA microbiome profiles from non-malignant lung tissues. Correcting for skewness and kurtosis eliminated the dramatic deviation in the quantile-quantile plots. We provided preliminary evidence that six established lung cancer risk SNPs were collectively associated with microbiome composition for both unweighted ( $P=0.0032$ ) and weighted ( $P=0.011$ ) UniFrac distance matrices. In summary, our methods will facilitate analyzing large-scale genome-wide association studies of the human microbiome.

Keywords: microbiome, genome-wide association study, gene-environment interaction, host genetics, tail probabilities, skewness and kurtosis

## 51 **Introduction**

52 The human body is colonized by bacteria, viruses and other microbes that exceed the number of human  
53 cells by at least 10-fold and that exceed the number of human genes by at least 100-fold. The relationship  
54 between a person and his or her microbial population, termed the microbiota, is generally mutualistic. The  
55 microbiota may promote human health by inhibiting infection by pathogens, conditioning the immune  
56 system, synthesizing and digesting nutrients, and maintaining overall homeostasis. The microbiome,  
57 which is the collection of all microbial genes, can be investigated through massively parallel, next-  
58 generation DNA sequencing technologies. By amplifying and sequencing highly variable regions of 16S  
59 ribosomal RNA genes that are present in all eubacteria, cost-effective and informative microbiome  
60 profiles down to the genus level are obtained.

61 The human microbiome has been associated with diseases, including obesity<sup>1</sup>, inflammatory bowel  
62 disease (IBD)<sup>2</sup>, colorectal cancer<sup>3</sup> and breast cancer<sup>4</sup>. Thus, identifying factors that have a sustained  
63 impact on the microbiome is fundamental for elucidating its role in health conditions and for developing  
64 treatment strategies. Increasing evidence suggests that microbiome composition at a specific site of the  
65 human body is impacted by environmental factors<sup>5,6</sup>, host genetics<sup>7,8</sup>, and possibly by their interactions. In  
66 the mouse, quantitative trait loci (QTL) studies have identified loci contributing to the variation of the gut  
67 microbiome using linkage analysis<sup>9,10</sup>. Recently, Goodrich et al.<sup>11</sup> systematically investigated the  
68 heritability of the human gut microbiome by comparing monozygotic twins to dizygotic twins and found  
69 substantial heritability in different microbiome metrics, suggesting the important role of host genetics on  
70 gut microbiome diversity. Associations between individual host genetic variants and microbiome taxa  
71 abundances have also begun to emerge in other human samples<sup>7,8,12</sup>. These studies suggest that genome-  
72 wide association studies (GWAS) have great potential to identify host genetic variants associated with  
73 microbiome diversity.

74 GWAS of complex human diseases have identified many risk SNPs; however, the biological mechanisms  
75 are largely unknown for the majority of the risk SNPs. QTL studies of intermediate traits, e.g., gene

76 expression<sup>13,14</sup>, DNA methylation<sup>15,16</sup>, chromatin structure<sup>17,18</sup>, and metabolite production<sup>19,20</sup>, have  
77 provided useful insights on biological mechanisms of the GWAS findings. The human microbiome at a  
78 specific body site is another important and informative intermediate trait for interpreting GWAS signals.  
79 Knights et al.<sup>8</sup> reported that a risk SNP for IBD located in *NOD2* was associated with the relative  
80 abundance of *Enterobacteriaceae* in the human gut microbiome. Tong et al.<sup>7</sup> show that a loss-of-function  
81 allele in *FUT2* that increases the risk of developing Crohn's Disease (CD) may modulate energy  
82 metabolism of the gut microbiome. In both examples, the microbiome is a potential intermediate for  
83 explaining the association between risk SNPs and disease risks, although a formal mediation analysis is  
84 required based on samples with genotype, microbiome, and disease status data. Moreover, identifying  
85 microbiome-associated host genetic variants has the potential to prioritize SNPs for discovery and to  
86 improve the performance of polygenetic risk prediction.

87 Three types of microbiome metrics can be derived as phenotypes for GWAS analysis. First, for each  
88 taxon at a specified taxonomic level (phylum, class, order, family, genus, and species), we calculate the  
89 relative abundance (RA) of the taxon as the ratio of the number of sequencing reads assigned to the taxon  
90 to the total number of sequencing reads. In 16S ribosomal RNA sequence profiles, approximately 100-  
91 200 taxa with average RAs  $\geq 0.1\%$  (from the phylum level to the genus level) across samples are abundant  
92 enough for QTL analysis. One can perform a Poisson regression to examine the association between RA  
93 of each taxon and each SNP. Significant associations are identified using Bonferroni correction ( $P < 5 \times 10^{-8}/200 = 2.5 \times 10^{-10}$ ) or by controlling FDR at an appropriate level. Second, multiple alpha-diversity metrics<sup>21</sup>  
94 can be calculated to reflect the richness (e.g., number of unique taxa) and evenness of each microbiome  
95 community after a procedure called rarefaction, that eliminates the dependence between estimated alpha  
96 diversity and the variable total number of sequencing reads across subjects. Once alpha-diversity metrics  
97 are derived, one may perform standard GWAS with alpha diversity as the phenotype using linear  
98 regression.  
99

100 Because a microbiota functions as a community, the most important analysis for a microbiome GWAS  
101 may be by assessing the complete structure of the community by using a pairwise microbiome distance  
102 matrix (or beta-diversity) of the microbial community. Microbiome distances can be defined in different  
103 ways, based on using phylogenetic tree information or each taxon's abundance information. Bray–Curtis  
104 dissimilarity<sup>22</sup> quantifies the difference between two microbiome communities using the abundance  
105 information of specific taxa. UniFrac<sup>23-25</sup> is another widely used distance metric. Unlike the Bray–Curtis  
106 dissimilarity metric, UniFrac compares microbiome communities by using information on the relative  
107 relatedness of each taxon, specifically by phylogenetic distance (branch lengths on a phylogenetic tree).  
108 UniFrac has two variants: the weighted UniFrac<sup>24</sup> that accounts for the taxa abundance information, and  
109 the unweighted UniFrac<sup>23</sup> that only models the information of presence or absence. Recently, a  
110 generalized UniFrac distance metric<sup>26</sup> was developed to automatically appreciate the advantages of  
111 weighted and unweighted UniFrac metrics and was shown to provide better statistical power to detect  
112 associations between human health conditions and microbiome communities. GWAS based on a  
113 microbiome distance matrix aims to identify host SNPs associated with microbiome composition.  
114 Intuitively, the microbiome distances tend to be smaller for pairs of subjects with similar genotypic values  
115 at the associated SNP. In addition, it is also of great interest to identify host SNPs that interact with an  
116 environment factor to affect microbiome composition. Importantly, beta diversity is temporally more  
117 stable compared with RA of taxa and alpha-diversity metrics based on the data from the Human  
118 Microbiome Project<sup>27</sup> (data not shown), suggesting smaller power loss for a GWAS due to temporal  
119 variability. To our knowledge, no statistical methods or software packages have been designed to  
120 efficiently analyze microbiome GWAS data using distance matrices as phenotypes.

121 In this paper, we develop a statistical framework and a computationally efficient package,  
122 microbiomeGWAS, for analyzing microbiome GWAS data. Our package allows the detection of host  
123 SNPs with a main effect or interaction with an environment factor, i.e. host SNPs interacting with an  
124 environment factor to affect the microbiome composition. We calculate the variance of the score statistics

125 by appropriately considering the dependence of the pairwise distances. Importantly, we show that the  
126 score statistics have positive skewness and kurtosis due to the dependence in pairwise distances, which  
127 makes the approximation of small  $P$ -values based on the asymptotic distribution too liberal, which easily  
128 yields false positive associations. Resampling methods, e.g. bootstrap or permutation, are computationally  
129 prohibitive for accurately approximating small  $P$ -values. We propose to improve the tail probability  
130 approximation by correcting for skewness and kurtosis of the score statistics. Numerical investigations  
131 demonstrate that our method provides a very accurate approximation even for  $P=10^{-7}$ . MicrobiomeGWAS  
132 runs very efficiently, taking 36 minutes for analyzing main effects and 69 minutes for analyzing both  
133 main and interaction effects for a study with 2000 subjects and 500,000 SNPs using a single core.  
134 MicrobiomeGWAS can be freely downloaded at <https://github.com/lscibb/microbiomeGWAS>.

135 We illustrate our methods by applying microbiomeGWAS to non-malignant lung tissue samples ( $N =$   
136 147) in the Environment And Genetics in Lung cancer Etiology (EAGLE) study<sup>28,29</sup>. Because smoking  
137 may alter microbiome composition, we tested both main effect and gene-smoking interaction effect.  
138 When  $P$ -values were calculated based on asymptotic distributions, the quantile-quantile (QQ) plots  
139 strongly deviated from the uniform distribution. Also, nine loci achieved genome-wide significance based  
140 on asymptotic approximations. Correcting for skewness and kurtosis eliminated the inflation and also the  
141 genome-wide significance of these loci. However, we provide evidence that the established lung cancer  
142 risk SNPs are associated with lung microbiome composition.

## 143 **Material and Methods**

### 144 **A score statistic for testing main effect**

145 Suppose that we have a set of  $N$  subjects genotyped with SNP arrays. For notational simplicity, we  
146 consider only one SNP with minor allele frequency (MAF) denoted as  $f$ . Our interest centers on testing  
147 whether the genotype of the SNP is associated with microbiome composition. Let  $g_n = 0,1,2$  represent  
148 the number of the minor alleles for the  $n^{th}$  subject. We assume that the 16S rRNA gene of microbiota

149 from a target site (e.g., gut) has been sequenced for these samples. Let  $d_{ij}$  be the microbiome distance  
 150 between the  $i^{th}$  and  $j^{th}$  subjects and  $\mathbf{D}$  be the distance matrix.

151 Intuitively, if the SNP is associated with the microbiome composition, the microbiome distances tend to  
 152 be smaller for subject pairs with similar genotypic values, as is illustrated in Figure 1. For  $N$  subjects,  
 153  $N(N - 1)/2$  pairs can be divided to three groups with genetic distance 0, 1 and 2. For example, a pair of  
 154 subjects with genotype (AA, AA) or (BB, BB) has genetic distance 0; a pair of subjects with genotype  
 155 (AA, BB) or (BB, AA) has genetic distance 2; all other pairs have genetic distance 1. Apparently, we  
 156 expect the microbiome distance to be positively correlated with genetic distance for subject pairs.

157 We define  $G_{ij} = |g_i - g_j|$  as the genetic distance for a pair of subjects  $(i, j)$ . We assume  $d_{ij} = \alpha +$   
 158  $\beta_M G_{ij} + \varepsilon_{ij}$  for all pairs of subjects. The score statistic for testing  $H_0: \beta_M = 0$  (main effect) vs.  $\beta_M > 0$   
 159 is derived by maximizing  $\sum_{i < j} (d_{ij} - \alpha - \beta_M G_{ij})^2$ :

$$S_M = \sum_{i < j} d'_{ij} G_{ij} \quad \text{with} \quad d'_{ij} = d_{ij} - \frac{1}{N(N-1)/2} \sum_{k < l} d_{kl}. \quad (1)$$

160 The variance  $Var_0(S_M | \mathbf{D})$  under  $H_0: \beta_M = 0$  is calculated by considering the dependence in  $(G_{ij}, G_{kl})$   
 161 and conditioning on the distance matrix  $\mathbf{D}$ . Briefly, we have  $Var_0(S_M | \mathbf{D}) = \sum_{i < j, k < l} d'_{ij} d'_{kl} Cov(G_{ij}, G_{kl})$ .  
 162 When  $(i, j, k, l)$  are distinct,  $G_{ij}$  and  $G_{kl}$  are independent, i.e.  $Cov(G_{ij}, G_{kl}) = 0$ . Some algebra leads to

$$Var_0(S_M | \mathbf{D}) = \frac{N(N-1)}{2} Var(G_{ij}) \mu_2 + N(N-1)(N-2) Cov(G_{ij}, G_{ik}) \mu_3 \quad (2)$$

163 where

$$\mu_2 = \frac{2}{N(N-1)} \sum_{i < j} (d'_{ij})^2 \quad (3)$$

164 and

$$\mu_3 = \frac{2}{N(N-1)(N-2)} \sum_{i < j < k} (d'_{ij} d'_{ik} + d'_{ij} d'_{jk} + d'_{ik} d'_{jk}). \quad (4)$$

165 The details for calculating  $Var(G_{ij})$  and  $Cov(G_{ij}, G_{ik})$  are in **Appendix A**. The variance-normalized  
 166 score statistic  $Z_M = S_M / \sqrt{Var_0(S_M | \mathbf{D})} \sim N(0, 1)$  under  $H_0$  asymptotically.  
 167 In analyses of real data, we typically have to adjust for covariates, including demographic variables and  
 168 principal component analysis (PCA) scores derived based on genotypes to eliminate potential population  
 169 stratification. Let  $X_i = (x_{i1}, \dots, x_{iv})$  denote the  $v$  covariates for the  $i^{th}$  subject. We assume  $d_{ij} = \alpha +$   
 170  $\beta_M G_{ij} + \sum_{t=1}^v w_t |x_{it} - x_{jt}| + \varepsilon_{ij}$ . Define  $d'_{ij} = d_{ij} - \hat{\alpha} - \sum_{t=1}^v \hat{w}_t |x_{it} - x_{jt}|$  with  $(\hat{w}_1, \dots, \hat{w}_v)$  being  
 171 estimated under  $H_0: \beta_M = 0$ . It is straightforward to verify that the score equation for  $\beta_M$  evaluated at  
 172  $H_0: \beta_M = 0$  is  $S'_M = \sum_{i < j} d'_{ij} G_{ij}$ . We can similarly derive the variance  $Var_0(S'_M | \mathbf{D}')$  and the normalized  
 173 score statistic  $Z'_M = S'_M / \sqrt{Var_0(S'_M | \mathbf{D}')}$ . Here,  $\mathbf{D}'$  denotes the residue distance matrix with  $(\mathbf{D}')_{ij} = d'_{ij}$ .

#### 174 **A score statistic for testing gene-environment interaction**

175 Let  $E_i$  denote an environmental variable. Define  $\Delta_{ij} = |g_i E_i - g_j E_j|$ . We extend the statistical framework  
 176 to detect the SNP-environment interaction by assuming  $d_{ij} = \alpha + \beta_M G_{ij} + \beta_E |E_i - E_j| + \beta_I \Delta_{ij} + \varepsilon_{ij}$ ,  
 177 where  $\beta_M$  denotes the main genetic effect,  $\beta_I$  denote the additive gene-environment effect and  $\beta_E$  denotes  
 178 the main effect of the environmental factor. We consider testing the null hypothesis that the SNP is not  
 179 associated with microbiome composition either directly or by interacting with  $E$ , *i. e.*  $H_0: \beta_M = \beta_I = 0$ .  
 180 The alternative hypothesis is  $H_1: \beta_M > 0$  or  $\beta_I > 0$ .

181 Again, we estimate  $\beta_E$  and  $\alpha$  under  $H_0$  and calculate  $d'_{ij} = d_{ij} - \hat{\alpha} - \hat{\beta}_E |E_i - E_j|$ . The score equations  
 182 evaluated under  $H_0$  are  $S_M = \sum_{i < j} d'_{ij} G_{ij}$  for  $\beta_M$  and  $S_I = \sum_{i < j} d'_{ij} \Delta_{ij}$  for  $\beta_I$ . Similar to (2), we derive  
 183 the variance  $Var_0(S_I | \mathbf{D}')$  by accounting for the dependence in  $(\Delta_{ij}, \Delta_{kl})$ :

$$Var_0(S_I | \mathbf{D}') = \frac{N(N-1)}{2} Var(\Delta_{ij}) \mu_2 + N(N-1)(N-2) Cov(\Delta_{ij}, \Delta_{ik}) \mu_3. \quad (5)$$

184 Let  $Z_M = S_M / \sqrt{Var_0(S_M | \mathbf{D}')}$  and  $Z_I = S_I / \sqrt{Var_0(S_I | \mathbf{D}')}$ . Asymptotically,  $Z_M \sim N(0, 1)$  and  $Z_I \sim N(0, 1)$   
 185 under  $H_0$ .



186 In **Appendix B**, we derive

$$Cov_0(S_M, S_I | \mathbf{D}') = \frac{N(N-1)}{2} Cov(G_{ij}, \Delta_{ij}) \mu_2 + N(N-1)(N-2) Cov(G_{ij}, \Delta_{ik}) \mu_3. \quad (6)$$

187 The correlation  $\rho = Cor_0(Z_M, Z_I | \mathbf{D}')$  is calculated as  $\rho = Cov_0(S_M, S_I | \mathbf{D}') / \sqrt{Var_0(S_M | \mathbf{D}') Var_0(S_I | \mathbf{D}')}$ .

188 Asymptotically,  $(Z_M, Z_I)$  follows a bivariate normal distribution with a correlation matrix  $\mathbf{\Omega} = \begin{pmatrix} 1 & \rho \\ \rho & 1 \end{pmatrix}$ .

189 In **Appendix C**, we derive a statistic for jointly testing  $H_0: \beta_M = \beta_I = 0$  vs.  $H_1: \beta_M > 0$  or  $\beta_I > 0$ .

190 Briefly, the 2D plane is partitioned to four parts (**Figure 2**). The joint statistic is derived as

$$Q = \begin{cases} (Z_M, Z_I) \mathbf{\Omega}^{-1} (Z_M, Z_I)^T & (Z_M, Z_I) \in A_1 \\ (w_1 Z_M + w_2 Z_I)^2 & (Z_M, Z_I) \in A_2 \\ (w_2 Z_M + w_1 Z_I)^2 & (Z_M, Z_I) \in A_3 \\ 0 & (Z_M, Z_I) \in A_4 \end{cases} \quad (7)$$

192 where  $w_1 = (\theta - 1/\theta)/2$ ,  $w_2 = (\theta + 1/\theta)/2$  and  $\theta = \sqrt{(1-\rho)/(1+\rho)}$ . The asymptotic P-value is

193 calculated as

$$P(Q > b^2) = q_1 P(\chi_2^2 > b^2) + q_2 P(N(0,1) > b) + q_3 P(N(0,1) > b), \quad (8)$$

195 where  $q_i = P((Z_M, Z_I) \in A_i)$ .

## 196 Improved P-value approximations by correcting for skewness and kurtosis

197 Theoretic investigation suggests that the score statistics  $Z_M$  and  $Z_I$  have a positive skewness, which makes

198 the tail probability approximations based on the asymptotic distribution  $N(0,1)$  unacceptably liberal

199 (**Figures 3A and 3B**). In a numeric example with skewness  $\gamma = 0.2$ ,  $P(Z > 5) = 2.9 \times 10^{-7}$  based on

200  $N(0,1)$ , which is approximately two orders of magnitude more significant than  $P = 3.9 \times 10^{-5}$  based on  $10^8$

201 permutations. The significance inflation becomes worse for smaller P-values and larger skewness  $\gamma$ .

202 Similar but more tedious calculations suggest that both statistics have positive kurtosis, making the

203 approximation based on  $N(0,1)$  even worse. One possible solution is to approximate tail probabilities

204 using permutations or bootstrap. However, these resampling methods are computationally prohibitive for  
 205 testing millions of common SNPs in a large-scale study.

206 To address this problem, we calculated the skewness  $\gamma$  and kurtosis  $\kappa$  of the score statistics under  
 207  $H_0$  (**Appendix D**). We propose to improve the tail probability approximation  $P_0(Z > b)$  by correcting for  
 208 the skewness and kurtosis, following the skewness correction in linkage analysis<sup>30,31</sup>. Technical details are  
 209 provided in **Appendix E**. Correcting for both skewness and kurtosis leads to an approximation

$$210 \quad P_0(Z > b) \approx e^{-b\xi_1 + (1+\sigma_1^2)\xi_1^2/2 + \gamma\xi_1^3/6 + \kappa\xi_1^4/24} \Phi(-\sigma_1\xi_1), \quad (9)$$

211 where  $\xi_1$  satisfies  $\xi + \gamma\xi^2/2 + \kappa\xi^3/6 = b$ ,  $\sigma_1^2 = 1 + \gamma\xi_1 + \kappa\xi_1^2/2$  and  $\Phi(\cdot)$  is the cumulative  
 212 distribution function of  $N(0,1)$ . Correcting for skewness but ignoring kurtosis (i.e., assuming  $\kappa = 0$ )  
 213 leads to an approximation

$$214 \quad P_0(Z > b) \approx e^{-b\xi_2 + (1+\sigma_2^2)\xi_2^2/2 + \gamma\xi_2^3/6} \Phi(-\sigma_2\xi_2), \quad (10)$$

215 where  $\xi_2 = (\sqrt{1 + 2\gamma b} - 1)/\gamma$ ,  $\sigma_2^2 = 1 + \gamma\xi_2$ . Numerical results presented in **Figure 3B** demonstrate  
 216 that (9) works very well.

217 Given the distance matrix  $\mathbf{D}$ ,  $\gamma_M \propto 1/N^{1/2}$ ,  $\gamma_I \propto 1/N^{1/2}$ ,  $\kappa_M \propto 1/N$  and  $\kappa_I \propto 1/N$  (**Appendix D**). Thus,  
 218 skewness decays much more slowly with sample size  $N$  than kurtosis (**Figures 3C and 3D**). Thus, even  
 219 for a large study with thousands of samples, correcting for skewness is necessary for accurately  
 220 evaluating tail probabilities. Importantly, both skewness and kurtosis highly depend on the MAF,  
 221 suggesting that the impact of skewness and kurtosis is different across SNPs with different MAF.  
 222 Numerical studies (**Figures 3C and 3D**) show that skewness and kurtosis are minimized when MAF=0.5  
 223 and maximized when MAF $\approx$ 0.2-0.3.

224 Finally, we discuss how to approximate the tail probability of  $Q$  in (7) for testing  $H_0: \beta_M = \beta_I = 0$  by  
 225 correcting for non-normality in  $Z_M$  and  $Z_I$ . When  $(Z_M, Z_I) \in A_2$  (or  $A_3$ ), we calculate the skewness

226  $E(w_1Z_M + w_2Z_I)^3$  and the kurtosis  $E(w_1Z_M + w_2Z_I)^4 - 3$  and use (9) to approximate  $P(w_1Z_M +$   
227  $w_2Z_I > b)$ . When  $(Z_M, Z_I) \in A_1$ , we first approximate their marginal  $P$ -values as  $p_M$  and  $p_I$  by (9), then  
228 calculate the normal quantile  $z_M = \Phi(1 - p_M)$  and  $z_I = \Phi(1 - p_I)$ . Because the correction primarily  
229 impacts the tails of the distributions, the correlation between the two statistics will remain roughly  
230 unchanged, i.e.,  $cor_0(Z_M, Z_I) \approx cor_0(z_M, z_I)$ . Thus, when  $(Z_M, Z_I) \in A_1$ , the tail probability is  
231 approximated as  $P(\chi_2^2 > (z_M, z_I)\Omega^{-1}(z_M, z_I)')$ .

## 232 **Results**

### 233 **Simulation results**

234 The main purpose of simulations was to investigate the type-I error of  $Z_M$  (for testing main genetic effect),  
235  $Z_I$  (for detecting SNP-environment interactions) and  $Q$  (for detecting either main genetic effect or SNP-  
236 environment effect or both). Simulations were performed under different combinations of sample size,  
237 MAF and microbiome distance matrices. To make simulations realistic, we used an unweighted distance  
238 matrix of the fecal microbiome samples with the 16S rRNA V4 region sequences from the American Gut  
239 Project (AGP). The OTU table rarefied to 10,000 sequence reads per sample, as well as metadata, was  
240 downloaded from the AGP website. Samples with less than 10,000 sequence reads were excluded from  
241 analysis. The weighted and the unweighted UniFrac distance matrices were generated in the Quantitative  
242 Insights Into Microbial Ecology<sup>21</sup> (QIIME) pipeline. Because antibiotics may substantially change  
243 microbiome composition to generate outliers that may distort the null distribution, we excluded samples  
244 with self-reported history of antibiotic usage within one month. After quality control, 1879 subjects  
245 remained for analysis. In simulations, we randomly selected  $N$  samples for a given sample size  $N$ .

246 For each setting, the type-I error rates were evaluated based on  $10^8$  simulations under  $H_0$ . For the  
247 interaction test and the joint test, the binary environment factor had a frequency of 50% and was  
248 simulated independent of the SNP. The type-I error rates are summarized in Table 1 for weighted UniFrac  
249 distance matrix. The skewness and kurtosis are reported in Figures 3C and 3D. The statistics adjusted for

250 skewness and kurtosis have accurate type-I error rates while the statistics without adjustment have  
251 unacceptably high type-I error rates. As sample size increases, the impact of skewness and kurtosis  
252 decreases. However, even for a study with  $N = 1000$ , the type-I error rates are still seriously inflated.  
253 The results for the unweighted UniFrac distance matrix and for MAF=0.5 are reported in **Table S1**.

#### 254 **Software implementation, memory requirement and computational complexity**

255 We implemented our algorithms in a software package, microbiomeGWAS, which is freely available at  
256 <https://github.com/lscibb/microbiomeGWAS>. MicrobiomeGWAS requires three sets of files: a  
257 microbiome distance matrix file, a set of PLINK binary files for GWAS genotypes, and a set of covariates.  
258 MicrobiomeGWAS processes one SNP at a time and does not load all genotype data into memory; thus, it  
259 requires only memory for storing the distance matrix. Variance, skewness and kurtosis can be partitioned  
260 into two parts related with the microbiome distance matrix and the MAF of the SNP separately; thus, we  
261 can quickly calculate these quantities for a predefined grid of MAFs. The overall computational  
262 complexity is about  $O(N^2M)$ , where  $N$  is sample size and  $M$  is the number of SNPs. Figure 4 reports the  
263 computation time on a Linux server using a single core.

#### 264 **GWAS of microbiome diversity in adjacent normal lung tissues**

265 We applied our methods to a set of lung cancer patients of Italian ancestry in the EAGLE<sup>28</sup> study. All  
266 subjects have germline genome-wide SNPs<sup>29</sup> and 16S rRNA microbiome data (V3-V4 region, Illumina  
267 MiSeq, 300 paired-end) in histologically normal lung tissues from these patients. Here, the histologically  
268 normal lung tissues were 1~5 cm from the tumor tissue. We performed a series of quality control steps to  
269 filter out low quality sequence reads: average quality score  $<20$  over 30bp windows, less than 60%  
270 similarity to the Greengenes<sup>32</sup> reference or identified as chimera reads using UCHIME<sup>33</sup>. Sequence reads  
271 were then processed by QIIME<sup>21</sup> to produce relative abundances (RA) of taxa, two alpha diversity metrics  
272 (observed number of species and Shannon's index) and beta-diversity metrics (unweighted and weighted

273 UniFrac distances) rarified to 1000 reads. We included 147 subjects with at least 1000 high quality  
274 sequence reads for genetic association analysis.

275 Out of the 147 subjects, 78 are current smokers, 8 are never smokers and 61 are former smokers. Because  
276 of the small number of never smokers, we merged never and former smokers as non-current smokers. All  
277 of the genetic association analyses were adjusted for sex, age, smoking status, and the top three PCA  
278 scores derived based on genome-wide SNPs. Here, the top three PCA scores were selected controlling  
279 population stratification because other PCA scores were unassociated with the distance matrices. We  
280 included 383,263 common SNPs with  $MAF \geq 10\%$  because rarer SNPs were expected to have no  
281 statistical power given the current sample size. We first performed GWAS analysis using PLINK<sup>34</sup> to  
282 identify SNPs associated with taxa with average RA greater than 0.1% or two alpha-diversity metrics. We  
283 did not detect genome-wide significant associations with either main effects or gene by smoking  
284 interactions.

285 Next, we performed GWAS analysis using unweighted and weighted UniFrac distance matrices as a  
286 representation of eubacteria beta-diversity. The results for testing main effects are reported in **Figure 5**.  
287 Results for testing joint effects (main effect and SNP by smoking status interaction) are reported in  
288 **Figure S1**. Because of the small sample size, we observed large values of skewness and kurtosis with  
289 magnitude varying with the MAF of the SNPs (**Figure 5A**). The score statistics based on the weighted  
290 UniFrac distance matrix had a much larger skewness and kurtosis than did the unweighted UniFrac matrix.  
291 **Figures 5B and 5C** report the quantile-quantile (QQ) plot of the logarithm of the association P-values for  
292 the unweighted and weighted UniFrac distance matrices, respectively. For each distance matrix, we  
293 produced QQ plots for P-values based on the asymptotic approximation and for P-values adjusted for  
294 skewness and kurtosis. For both distance matrices, the QQ plots before adjustment strongly deviated from  
295 the expected uniform distribution. Our adjustment eliminated the deviation. In addition, consistent with  
296 the observation that the skewness and kurtosis were larger for the weighted UniFrac distance matrix, the  
297 QQ plot deviated more for the analysis based on the weighted UniFrac distance. Note that the skewness

298 and kurtosis only affect the tail probabilities; thus, the inflation of the QQ plot is not reflected by the  
299 genomic control lambda value<sup>35</sup> calculated as the median of P-values. In fact, lambda  $\approx$  1 for all four QQ  
300 plots.

301 Without correcting for skewness and kurtosis, we identified three and six loci achieving genome-wide  
302 significance ( $P < 5 \times 10^{-8}$ ) for the unweighted and weighted UniFrac distance matrices, respectively  
303 (**Figure 5D**). After correcting for skewness and kurtosis, no locus remained genome-wide significant  
304 (**Figure 5D**), which was verified by  $10^8$  permutations. Importantly, skewness and kurtosis had a dramatic  
305 effect on tail probabilities. Here, we use SNP rs12785513 as an example, which was identified as the top  
306 SNP in both analyses. In the unweighted UniFrac analysis,  $P=4.4 \times 10^{-9}$  without adjustment and  $P=1.6 \times 10^{-6}$   
307 after adjustment, a 364-fold inflation. The inflation was even larger for weighted UniFrac analysis  
308 because of larger skewness and kurtosis (**Figure 5A**). In fact,  $P=3.4 \times 10^{-10}$  without adjustment and  
309  $P=3.5 \times 10^{-6}$  after adjustment, a 1000-fold inflation. Although these SNPs were not significant genome-  
310 wide, they were the top SNPs from the current study. Thus, we report box-plots for each of these nine  
311 SNPs (**Figure 5E**). As expected, in all box plots, microbiome distances tend to be larger in subject pairs  
312 with greater genetic distance at these SNPs. These associations remain to be replicated in studies with  
313 larger sample sizes.

314 Finally, we concentrated on the six common SNPs in four genomic regions reported to be associated with  
315 lung cancer risk in GWAS of European subjects: rs2036534 and rs1051730 at 15q25.1<sup>36-39</sup> (*CHRNA5–*  
316 *CHRNA3–CHRNA4*), rs2736100 and rs401681 at locus 5p15.33<sup>29,40</sup> (*TERT/CLPTMIL*), rs6489769<sup>41</sup> at  
317 12p13.3 (*RAD52*), and rs1333040 at 9p21.3<sup>42</sup> (*CDKN2A/CDKN2B*). The SNPs at 15q25.1 and 5p15.33  
318 have the largest effect sizes for lung cancer risk based on the meta-analysis from the Transdisciplinary  
319 Research in Cancer of the Lung (TRICL) consortium<sup>42</sup>: OR=1.32 for rs1051730, OR=1.26 for rs2036534,  
320 OR=1.13 for rs2736100, and OR=1.14 for rs401681. Rs3131379 at locus 6p21.33<sup>40</sup> (*BAT3/MSH5*) was  
321 excluded because MAF=7.5%. No SNPs were significantly associated with taxa RAs or alpha-diversity  
322 metrics after correcting for multiple testing (data not shown). However, association analysis based on the

323 UniFrac distance matrices provided evidence that these SNPs may be associated with the lung microbiota  
324 (**Table 2**). Importantly, for both unweighted and weighted UniFrac analyses, all six SNPs had  $P$ -value <  
325 0.5. These SNPs were independent except that rs2036534 and rs1051730 at 15q25.1 were weakly  
326 correlated with  $R^2=0.15$ . A test combining six  $z$ -scores ( $Z_M$ ) and adjusting for the weak correlation  
327 yielded overall  $P$ -values 0.0033 and 0.011 for the unweighted and the weighted UniFrac distance matrices,  
328 respectively. These results suggest that lung cancer risk SNPs were enriched for genetic association with  
329 the composition of the lung microbiome. The results for testing interactions and joint effects are reported  
330 in **Table S2**.

### 331 **Discussion**

332 We developed a software package, microbiomeGWAS, for identifying host genetic variants associated  
333 with microbiome composition. MicrobiomeGWAS can test both main effect and SNP-environment  
334 interactions. Importantly, we found that the score statistics had positive skewness and kurtosis and that  
335 the tail probabilities evaluated based on asymptotic approximations were very liberal. We addressed this  
336 problem by explicitly adjusting for skewness and kurtosis. MicrobiomeGWAS runs very efficiently and  
337 takes only 36 minutes for testing main effects and 69 minutes for testing joint effects in a GWAS with  
338 2000 subjects and 500,000 markers. Other statistical methods exist for testing the association of  
339 microbiome distance matrices. PERMANOVA<sup>43</sup> is an extension of multivariate analysis of variance to a  
340 matrix of pairwise distances and relies on permutations to evaluate significance. MiRKAT<sup>44</sup>, a recently  
341 proposed method based on kernel regression, takes hours for evaluating one association for 2000 subjects.  
342 Neither is computationally feasible for analyzing a large-scale GWAS of microbiome.

343 Interactions of host genetic susceptibility with the microbiome have been postulated for many conditions,  
344 including inflammatory bowel diseases<sup>45,46</sup>, autoimmune and rheumatic diseases<sup>47-50</sup>, diabetes<sup>51</sup>, and  
345 cancer especially of the colon<sup>52</sup>. All models of these host-microbiome interactions also note the critical  
346 role of environmental factors including diet, smoking, drugs, and antibiotics and other medications<sup>53</sup>.

347 Although based on a very small initial sample set, the suggestive associations that we found between the  
348 six known lung cancer risk SNPs and the microbiome of adjacent normal lung tissue samples, including  
349 effects of cigarette smoking, provide preliminary evidence that our microbiomeGWAS method is likely to  
350 be a useful tool for generating data that will unravel host-microbiome interactions with high confidence.

351 We are working on two extensions for microbiomeGWAS: (1) jointly testing additive and dominant  
352 effects and (2) testing genetic associations using many microbiome distance matrices. We have assumed  
353 an additive effect model (**Figure 1**); however, several top SNPs in the EAGLE data suggest a dominant  
354 effect (e.g. rs8083714 in **Figure 5E**). Thus, a statistic for jointly testing the additive and dominant effects  
355 might be powerful for this scenario. The second extension is motivated by the fact that the power to  
356 detect associations depends heavily on the choice of distance matrix. The recently developed generalized  
357 UniFrac<sup>26</sup> (gUniFrac) defines a series of distance matrices to reflect different emphasis of using taxa  
358 relative abundance information. gUniFrac has been shown to have a robust power for association studies<sup>26</sup>.  
359 Extending microbiomeGWAS to gUniFrac, however, requires solving two problems. First, the  
360 computational complexity is proportional to the number of distance matrices analyzed for associations,  
361 which can be addressed by implementing the algorithms using multithreading technology. Second, we  
362 need to derive accurate analytic approximations to the association *P*-values by correcting for the multiple  
363 testing introduced by many distance matrices. MiRKAT<sup>44</sup> has an option for using gUniFrac; however,  
364 intensive permutations are required to evaluate *P*-values.

365 In summary, GWAS of the microbiome of each body site has a potential to understand microbiome  
366 variation, to elucidate biological mechanisms of genetic associations, to improve the power of identifying  
367 novel disease-associated genetic variants, and to improve the performance of genetic risk prediction. We  
368 expect our methods and software to be useful for large-scale GWAS of human microbiome.

369

370



371 **Appendices**

372 **Appendix A:**  $Var(G_{ij}), Cov(G_{ij}, G_{ik}), Var(\Delta_{ij})$  and  $Cov(\Delta_{ij}, \Delta_{ik})$ .

373 We first calculate  $E(G_{ij}), Var(G_{ij})$  and  $Cov(G_{ij}, G_{ik})$ . Let  $p_t = P(g_i = t)$  with  $p_0, p_1, p_2 \geq 0$  and

374  $p_0 + p_1 + p_2 = 1$ . We can also assume the Hardy–Weinberg equilibrium and characterize the

375 probabilities as the allele frequency:  $p_0 = (1 - f)^2, p_1 = 2f(1 - f)$  and  $p_2 = f^2$ . Some algebra leads to

$$E(G_{ij}) = E|g_i - g_j| = \sum_{m,n \in \{0,1,2\}} p_m p_n |m - n| = 2p_0 p_1 + 2p_1 p_2 + 4p_0 p_2; \quad (A1)$$

376  $Var(G_{ij}) = E(G_{ij}^2) - E(G_{ij})^2 = (2p_0 p_1 + 2p_1 p_2 + 8p_0 p_2) - (2p_0 p_1 + 2p_1 p_2 + 4p_0 p_2)^2;$  (A2)

$$Cov(G_{ij}, G_{ik}) = p_1(1 - p_1) + 4p_0 p_2(1 + p_1) - (2p_0 p_1 + 2p_1 p_2 + 4p_0 p_2)^2. \quad (A3)$$

377 Now consider  $\Delta_{ij} = |g_i E_i - g_j E_j|$ . When  $E_i$  is binary,  $g_i E_i = 0, 1$  or  $2$ . Let  $p'_t = P(g_i E_i = t)$ . Then,

378  $E(\Delta_{ij}), Var(\Delta_{ij})$  and  $Cov(\Delta_{ij}, \Delta_{ik})$  can be calculated similarly using (A1), (A2) and (A3).

379 **Appendix B:** Calculating  $\rho = Cor_0(Z_M, Z_I | \mathbf{D}')$

380 Let  $G'_{ij} = G_{ij} - EG_{ij}$  and  $\Delta'_{ij} = \Delta_{ij} - E\Delta_{ij}$ . We first calculate the covariance under  $H_0$ :

$$Cov_0(S_M, S_I | \mathbf{D}') = Cov_0 \left( \sum_{i < j} d'_{ij} G'_{ij}, \sum_{m < n} d'_{mn} \Delta'_{mn} \right) = \sum_{i < j, m < n} d'_{ij} d'_{mn} Cov(G_{ij}, \Delta_{mn}).$$

381 When  $(i, j, m, n)$  are distinct,  $Cov(G_{ij}, \Delta_{mn}) = 0$ . Some algebra leads to

$$Cov_0(S_M, S_I | \mathbf{D}') = \binom{N}{2} Cov(G_{ij}, \Delta_{ij}) \mu_2 + 6 \binom{N}{3} Cov(G_{ij}, \Delta_{ik}) \mu_3 \quad (A4)$$

382 with  $\mu_2$  and  $\mu_3$  specified in (2) and (3). Combining (2), (5) and (A4), we have

$$\rho = \frac{Cov_0(S_M, S_I | \mathbf{D}')}{\sqrt{Var_0(S_M | \mathbf{D}') Var_0(S_I | \mathbf{D}')}} \xrightarrow{N \rightarrow \infty} \frac{Cov(G_{ij}, \Delta_{ik})}{\sqrt{Cov(G_{ij}, G_{ik}) Cov(\Delta_{ij}, \Delta_{ik})}}. \quad (A5)$$

383 (A5) suggests that the correlation is asymptotically independent of the microbiome distance matrix. In  
 384 real data analyses, we found that (A5) was very accurate when sample size  $N \geq 50$ . The details of  
 385 calculating  $Cov(G_{ij}, \Delta_{ij})$  and  $Cov(G_{ij}, \Delta_{ik})$  are provided in **Supplemental Data**.

386 **Appendix C:** A statistic for jointly testing  $H_0: \beta_M = \beta_I = 0$  vs  $H_1: \beta_M > 0$  or  $\beta_I > 0$

387 Denote  $\mathbf{Z} = (Z_M, Z_I)^T$ . Under  $H_0$ ,  $\mathbf{Z} \sim N(\mathbf{0}, \Sigma)$  with  $\Sigma = \begin{pmatrix} 1 & \rho \\ \rho & 1 \end{pmatrix}$ . Let  $\xi_M = E_1 Z_M \geq 0$  and  $\xi_I = E_1 Z_I \geq 0$   
 388 be the non-centrality parameter of the two score statistics. Apparently the original testing problem is  
 389 equivalent for testing  $H_0: \xi_M = \xi_I = 0$  vs  $H_1: \xi_M > 0$  or  $\xi_I > 0$ . Given the observed values  $(Z_M, Z_I)$ , the  
 390 likelihood ratio statistic is simplified as

$$Q = \mathbf{Z}^T \Sigma^{-1} \mathbf{Z} - (\mathbf{Z} - \xi)^T \Sigma^{-1} (\mathbf{Z} - \xi) \quad (\text{A6})$$

391 where  $\xi = (\xi_M, \xi_I)^T = \operatorname{arginf}_{\xi_M \geq 0, \xi_I \geq 0} Q$  (**Figure S2A**).

392 To simplify the optimization problem in (A6), we perform a linear transformation:  $\mathbf{Y}^T = \mathbf{Z}^T \Sigma^{-\frac{1}{2}}$  and  
 393  $\mathbf{v}^T = \xi^T \Sigma^{-\frac{1}{2}}$ , where

$$\Sigma^{-\frac{1}{2}} = \frac{1}{\sqrt{2}} \begin{pmatrix} 1 & 1 \\ -1 & 1 \end{pmatrix} \begin{pmatrix} 1/\sqrt{1-\rho} & 0 \\ 0 & 1/\sqrt{1+\rho} \end{pmatrix}. \quad (\text{A7})$$

394 Under this transformation,  $Q = \mathbf{Y}^T \mathbf{Y} - (\mathbf{Y} - \mathbf{v})^T (\mathbf{Y} - \mathbf{v})$  and can be interpreted as the difference of the  
 395 square of two distances (**Figure S2B**). The original parameter space  $\{(\xi_M, \xi_I): \xi_M \geq 0, \xi_I \geq 0\}$  is now  
 396 transformed to  $\{(v_1, v_2): v_2 \geq \theta v_1, v_2 \geq -\theta v_1\}$  with  $\theta = \sqrt{(1-\rho)/(1+\rho)}$ . Thus, the new parameter  
 397 space is bounded by two lines represented by  $v_2 \geq \theta v_1$  and  $v_2 \geq -\theta v_1$ . We partition the 2D plane into  
 398 four parts (see **Figure S2B**), identify  $\mathbf{v} = \operatorname{arginf}_{\mathbf{v} \in A_1} (\mathbf{Y} - \mathbf{v})^T (\mathbf{Y} - \mathbf{v})$  and calculate  $Q$ :

$$Q = \begin{cases} Y_1^2 + Y_2^2 & (Y_1, Y_2) \in A_1 \\ (Y_2 - Y_1/\theta)^2 / (1 + \theta^{-2}) & (Y_1, Y_2) \in A_2 \\ (Y_2 + Y_1/\theta)^2 / (1 + \theta^{-2}) & (Y_1, Y_2) \in A_3 \\ 0 & (Y_1, Y_2) \in A_4 \end{cases} \quad (\text{A8})$$

400 We now perform an inverse transformation using matrix

$$\Sigma^{\frac{1}{2}} = \left[ \frac{1}{\sqrt{2}} \begin{pmatrix} \sqrt{1-\rho} & 0 \\ 0 & \sqrt{1+\rho} \end{pmatrix} \begin{pmatrix} 1 & -1 \\ 1 & 1 \end{pmatrix} \right] \quad (A9)$$

401 to return to the original parameter space. The four areas  $\{A_1, A_2, A_3, A_4\}$  under the original space are in  
402 **Figure 2** and **Figure S2C**.

403 Tedious calculations show that  $(Y_2 + Y_1/\theta)^2/(1 + \theta^{-2}) = (w_2 Z_M + w_1 Z_I)^2$  with  $w_1 = (\theta - 1/\theta)/2$   
404 and  $w_2 = (\theta + 1/\theta)/2$ . Similarly,  $(Y_2 - Y_1/\theta)^2/(1 + \theta^{-2}) = (w_1 Z_M + w_2 Z_I)^2$ . This proves (7). In  
405 addition,  $w_1 Z_M + w_2 Z_I \geq 0$  and  $w_1^2 + 2\rho w_1 w_2 + w_2^2 = 1$ ; thus,  $P\{(w_1 Z_M + w_2 Z_I)^2 > b^2\} =$   
406  $P\{w_1 Z_M + w_2 Z_I > b\} = P\{N(0,1) > b\}$ . This proves (8). The probabilities in (8) could also be  
407 calculated from **Figure S2B**:  $q_1 = 1/2 - (\arctan \theta)/\pi$ ,  $q_2 = q_3 = 1/4$ .

408 **Appendix D**: Calculating skewness and kurtosis under  $H_0$

409 By definition,  $\gamma = E_0(S_M^3 | \mathbf{D}') / \text{Var}_0^{3/2}(S_M | \mathbf{D}')$  and  $\kappa = E_0(S_M^4 | \mathbf{D}') / \text{Var}_0^2(S_M | \mathbf{D}') - 3$ . We first  
410 calculate  $E_0(S_M^3 | \mathbf{D}')$ . Let  $G'_{ij} = G_{ij} - E G_{ij}$ . We have

$$E_0(S_M^3 | \mathbf{D}') = E_0 \left( \sum_{i < j} d'_{ij} G'_{ij} \right)^3 = \sum_{i < j, m < n, s < t} d'_{ij} d'_{mn} d'_{st} E G'_{ij} G'_{mn} G'_{st}.$$

411 **Figure S3A** lists all combinations of  $(i, j, m, n, s, t)$  with  $E G'_{ij} G'_{mn} G'_{st} \neq 0$ , which leads to

$$412 E_0(S_M^3 | \mathbf{D}') = \binom{N}{2} \mu_4 E G_{ij}^4 + \binom{N}{3} (\mu_5 E G_{ij}^2 G'_{ik} + \mu_6 E G_{ij} G'_{jk} G'_{ik}) + \binom{N}{4} (\mu_7 E G_{ij} G'_{jk} G'_{kl} + \mu_8 E G_{ij} G'_{ik} G'_{il}),$$

413 where  $(\mu_4, \mu_5, \mu_6, \mu_7, \mu_8)$  are provided in **Supplemental Data**. Similarly,

$$E_0(S_M^4 | \mathbf{D}') = E_0 \left( \sum_{i < j} d'_{ij} G'_{ij} \right)^4 = \sum_{i < j, m < n, s < t, x < y} d'_{ij} d'_{mn} d'_{st} d'_{xy} E G'_{ij} G'_{mn} G'_{st} G'_{xy}.$$

414 **Figure S3B** lists 15 combinations of  $(i, j, m, n, s, t, x, y)$  with  $E G'_{ij} G'_{mn} G'_{st} G'_{xy} \neq 0$ . Thus,

$$\begin{aligned}
 E_0(S_M^4 | \mathbf{D}) &= \binom{N}{2} \mu_9 E G_{ij}^4 + \binom{N}{3} (\mu_{10} E G_{ij}^3 G'_{ik} + \mu_{11} E G_{ij}^2 G'_{ik}{}^2 + \mu_{12} E G_{ij}^2 G'_{jk} G'_{ik}) \\
 &+ \binom{N}{4} (\mu_{13} E G_{ij}^2 G'_{jk} G'_{kl} + \mu_{14} E G_{ij}^2 G'_{jk} G'_{kl} + \mu_{15} E G_{ij}^2 G'_{ik} G'_{il} + \mu_{16} E G_{ij}^2 G'_{jk} G'_{kl} G'_{il} + \mu_{17} E G_{ij}^2 G'_{jk} G'_{kl} G'_{il} + \mu_{18} E G_{ij}^2 G'_{kl}{}^2) \\
 &+ \binom{N}{5} (\mu_{19} E G_{ij}^2 G'_{jk} G'_{kl} G'_{lm} + \mu_{20} E G_{ij}^2 G'_{ik} G'_{il} G'_{im} + \mu_{21} E G_{ij}^2 G'_{ik} G'_{il} G'_{im} + \mu_{22} E G_{ij}^2 G'_{ik} G'_{lm}{}^2) + \binom{N}{6} \mu_{23} E G_{ij}^2 G'_{ik} G'_{lm} G'_{ln}
 \end{aligned}$$

415 The constants  $(\mu_9, \dots, \mu_{23})$  are dependent on  $\mathbf{D}$  and are provided in **Supplemental Data**.

416 Note that  $Var_0(S_M | \mathbf{D}') \sim O(N^3)$ ,  $E_0(S_M^3 | \mathbf{D}') \sim O(N^4)$ , thus  $\gamma \sim O(\frac{1}{\sqrt{N}})$ . Similarly, we can prove  $\kappa \sim O(\frac{1}{N})$ .

### 417 **Appendix E: Improve $P$ -value approximations by adjusting for skewness and kurtosis**

418 We assume that  $E_0 Z = 0$ ,  $Var_0 Z = 1$ ,  $\gamma = E_0 Z^3$  and  $\kappa = E_0 Z^4 - 3$  under the original probability  
 419 measure  $P_0$ . The tail probability  $P_0(Z > b)$  for a large value of  $b$  is sensitive to the non-normality of  $Z$ ,  
 420 characterized by  $\gamma$  and  $\kappa$ . We define a new probability measure by embedding to the exponential  
 421 probability density

$$dP_\xi = \exp(\xi Z - \phi(\xi)) dP_0 \quad (A10)$$

422 where  $\phi(\xi) = \log E_0 \exp(\xi Z)$  is the log moment generating function. Note that  $\gamma = \phi'''(0)$  and  $\kappa =$   
 423  $\phi''''(0)$ . Because  $E_0(Z) = 0$  and  $Var_0(Z) = 1$ , the Taylor expansion leads to  $\phi(\xi) \approx \xi^2/2 + \gamma \xi^3/6 +$   
 424  $\kappa \xi^4/24$ . Under  $P_\xi$ , we have

$$E_\xi Z = \int Z dP_\xi = \phi'(\xi) \approx \xi + \frac{\gamma}{2} \xi^2 + \frac{\kappa}{6} \xi^3 \quad (A11)$$

425 and

$$Var_\xi Z = \phi''(\xi) \approx 1 + \gamma \xi + \frac{\kappa}{2} \xi^2. \quad (A12)$$

426 We choose  $\xi$  such that  $E_\xi Z \approx b$  by numerically solving an equation

$$\xi + \frac{\gamma}{2} \xi^2 + \frac{\kappa}{6} \xi^3 = b. \quad (A13)$$

427 Under the probability measure  $P_\xi$ ,  $Z \sim N(b, \sigma^2)$  approximately with  $\sigma^2 = 1 + \gamma \xi + \kappa \xi^2/2$  in (A12).

428 By the likelihood ratio identity and (A10), we have

$$P_0(Z > b) = E_0 I_{Z>b} = E_\xi \frac{dP_0}{dP_\xi} I_{Z>b} = E_\xi e^{\phi(\xi) - \xi Z} I_{Z>b} = e^{\phi(\xi)} E_\xi e^{-\xi Z} I_{Z>b}. \quad (\text{A14})$$

429 Note that  $e^{-\xi Z}$  decays very fast when  $Z$  increases. Thus, the integral  $E_\xi e^{-\xi Z} I_{Z>b}$  does not heavily depend  
430 on the tail distribution of  $Z$ . Assuming  $Z \sim N(b, \sigma^2)$  under  $P_\xi$ , we can verify that

$$E_\xi e^{-\xi Z} I_{Z>b} = e^{-b\xi + \frac{\sigma^2 \xi^2}{2}} \Phi(-\sigma\xi). \quad (\text{A15})$$

431 Combining (A14) and (A15) gives  $P_0(Z > b) \approx e^{\phi(\xi) - b\xi + \frac{\sigma^2 \xi^2}{2}} \Phi(-\sigma\xi)$ , which is further approximated  
432 as  $P_0(Z > b) \approx e^{-b\xi + \frac{(1+\sigma^2)}{2}\xi^2 + \frac{\gamma}{6}\xi^3 + \frac{\kappa}{24}\xi^4} \Phi(-\sigma\xi)$ , because  $\phi(\xi) \approx \xi^2/2 + \gamma\xi^3/6 + \kappa\xi^4/24$  based on  
433 the Taylor expansion. This proves (9).

434 If we correct skewness but assume kurtosis  $\kappa = 0$ , then  $\phi(\xi) \approx \xi^2/2 + \gamma\xi^3/6$ . We recalculate  $\xi$  by  
435 setting  $\kappa = 0$  in (A13) to derive  $\xi = (\sqrt{1 + 2\gamma b} - 1)/\gamma$ . This proves (10).

436

437 **Supplemental Data**

438 Supplemental Data include 2 tables and 3 figures can be found with this article online at XXX.

439 **Acknowledgements**

440 This study utilized the high-performance computational capabilities of the Biowulf Linux cluster at the  
441 National Institutes of Health, Bethesda, MD. (<http://biowulf.nih.gov>). The project was supported by the  
442 NIH Intramural Research program.

443

444 **Web Resources**

445 The URLs for data provide herein are as follows:

446

447 American Gut Project: <https://www.microbio.me/americangut/>

448 PLINK: <http://pngu.mgh.harvard.edu/~purcell/plink/>

449 QIIME: <http://qiime.org/>

450 EAGLE study: <http://eagle.cancer.gov/>

451

452

453 **References**

- 454 1. Turnbaugh, P.J. *et al.* A core gut microbiome in obese and lean twins. *Nature* **457**, 480-4 (2009).  
455 2. Morgan, X.C. *et al.* Dysfunction of the intestinal microbiome in inflammatory bowel disease and  
456 treatment. *Genome Biol* **13**, R79 (2012).  
457 3. Ahn, J. *et al.* Human gut microbiome and risk for colorectal cancer. *J Natl Cancer Inst* **105**, 1907-  
458 11 (2013).  
459 4. Goedert, J.J., Jones, G., Hua, X., Xu, X., Yu, G., Flores, R., Falk, R. T., Gail, M. H., Shi, J., Ravel, J.  
460 and Feigelson, S. H. Investigation of the Association Between the Fecal Microbiota and Breast  
461 Cancer in Postmenopausal Women: a Population-Based Case-Control Pilot Study. *J Natl Cancer*  
462 *Inst.* **1;107(8)**(2015).  
463 5. Lax, S. *et al.* Longitudinal analysis of microbial interaction between humans and the indoor  
464 environment. *Science* **345**, 1048-1052 (2014).  
465 6. Wu, G.D. *et al.* Linking long-term dietary patterns with gut microbial enterotypes. *Science* **334**,  
466 105-8 (2011).  
467 7. Tong, M. *et al.* Reprogramming of gut microbiome energy metabolism by the FUT2 Crohn's  
468 disease risk polymorphism. *ISME J* **8**, 2193-206 (2014).  
469 8. Knights, D. *et al.* Complex host genetics influence the microbiome in inflammatory bowel  
470 disease. *Genome Med* **6**, 107 (2014).  
471 9. McKnite, A.M. *et al.* Murine Gut Microbiota Is Defined by Host Genetics and Modulates  
472 Variation of Metabolic Traits. *Plos One* **7**(2012).  
473 10. Benson, A.K. *et al.* Individuality in gut microbiota composition is a complex polygenic trait  
474 shaped by multiple environmental and host genetic factors. *Proc Natl Acad Sci U S A* **107**, 18933-  
475 8 (2010).  
476 11. Goodrich, J.K. *et al.* Human genetics shape the gut microbiome. *Cell* **159**, 789-99 (2014).  
477 12. Davenport, E.R. *et al.* Genome-Wide Association Studies of the Human Gut Microbiota. *PLoS*  
478 *One* **10**, e0140301 (2015).  
479 13. Consortium, G.T. Human genomics. The Genotype-Tissue Expression (GTEx) pilot analysis:  
480 multitissue gene regulation in humans. *Science* **348**, 648-60 (2015).  
481 14. Battle, A. *et al.* Characterizing the genetic basis of transcriptome diversity through RNA-  
482 sequencing of 922 individuals. *Genome Research* **24**, 14-24 (2014).

- 483 15. Bell, J.T. *et al.* DNA methylation patterns associate with genetic and gene expression variation in  
484 HapMap cell lines (vol 12, pg R10, 2011). *Genome Biology* **12**(2011).
- 485 16. Shi, J. *et al.* Characterizing the genetic basis of methylome diversity in histologically normal  
486 human lung tissue. *Nat Commun* **5**, 3365 (2014).
- 487 17. McVicker, G. *et al.* Identification of Genetic Variants That Affect Histone Modifications in Human  
488 Cells. *Science* **342**, 747-749 (2013).
- 489 18. Kilpinen, H. *et al.* Coordinated Effects of Sequence Variation on DNA Binding, Chromatin  
490 Structure, and Transcription. *Science* **342**, 744-747 (2013).
- 491 19. Suhre, K. *et al.* A genome-wide association study of metabolic traits in human urine. *Nat Genet*  
492 **43**, 565-9 (2011).
- 493 20. Sabatti, C. *et al.* Genome-wide association analysis of metabolic traits in a birth cohort from a  
494 founder population. *Nat Genet* **41**, 35-46 (2009).
- 495 21. Caporaso, J.G. *et al.* QIIME allows analysis of high-throughput community sequencing data. *Nat*  
496 *Methods* **7**, 335-6 (2010).
- 497 22. Bray, J.R.a.C., J. T. An ordination of upland forest communities of southern Wisconsin. *Ecological*  
498 *Monographs* **27:325-349**(1957).
- 499 23. Lozupone, C. & Knight, R. UniFrac: a new phylogenetic method for comparing microbial  
500 communities. *Appl Environ Microbiol* **71**, 8228-35 (2005).
- 501 24. Lozupone, C.A., Hamady, M., Kelley, S.T. & Knight, R. Quantitative and qualitative beta diversity  
502 measures lead to different insights into factors that structure microbial communities. *Appl*  
503 *Environ Microbiol* **73**, 1576-85 (2007).
- 504 25. Lozupone, C., Hamady, M. & Knight, R. UniFrac--an online tool for comparing microbial  
505 community diversity in a phylogenetic context. *BMC Bioinformatics* **7**, 371 (2006).
- 506 26. Chen, J. *et al.* Associating microbiome composition with environmental covariates using  
507 generalized UniFrac distances. *Bioinformatics* **28**, 2106-13 (2012).
- 508 27. Gevers, D. *et al.* The Human Microbiome Project: a community resource for the healthy human  
509 microbiome. *PLoS Biol* **10**, e1001377 (2012).
- 510 28. Landi, M.T. *et al.* Environment And Genetics in Lung cancer Etiology (EAGLE) study: an  
511 integrative population-based case-control study of lung cancer. *BMC Public Health* **8**, 203 (2008).
- 512 29. Landi, M.T. *et al.* A genome-wide association study of lung cancer identifies a region of  
513 chromosome 5p15 associated with risk for adenocarcinoma. *Am J Hum Genet* **85**, 679-91 (2009).
- 514 30. Tu, I.P. & Siegmund, D. The maximum of a function of a Markov chain and application to linkage  
515 analysis. *Advances in Applied Probability* **31**, 510-531 (1999).
- 516 31. Siegmund, D. Sequential Analysis: Tests and Confidence Intervals. *New York: Springer.* (1985).
- 517 32. DeSantis, T.Z., Dubosarskiy, I., Murray, S.R. & Andersen, G.L. Comprehensive aligned sequence  
518 construction for automated design of effective probes (CASCADE-P) using 16S rDNA.  
519 *Bioinformatics* **19**, 1461-8 (2003).
- 520 33. Edgar, R.C., Haas, B.J., Clemente, J.C., Quince, C. & Knight, R. UCHIME improves sensitivity and  
521 speed of chimera detection. *Bioinformatics* **27**, 2194-200 (2011).
- 522 34. Purcell, S. *et al.* PLINK: a tool set for whole-genome association and population-based linkage  
523 analyses. *Am J Hum Genet* **81**, 559-75 (2007).
- 524 35. Devlin, B. & Roeder, K. Genomic control for association studies. *Biometrics* **55**, 997-1004 (1999).
- 525 36. Hung, R.J. *et al.* A susceptibility locus for lung cancer maps to nicotinic acetylcholine receptor  
526 subunit genes on 15q25. *Nature* **452**, 633-7 (2008).
- 527 37. McKay, J.D. *et al.* Lung cancer susceptibility locus at 5p15.33. *Nat Genet* **40**, 1404-6 (2008).
- 528 38. Thorgeirsson, T.E. *et al.* A variant associated with nicotine dependence, lung cancer and  
529 peripheral arterial disease. *Nature* **452**, 638-42 (2008).

- 530 39. Amos, C.I. *et al.* Genome-wide association scan of tag SNPs identifies a susceptibility locus for  
531 lung cancer at 15q25.1. *Nat Genet* **40**, 616-22 (2008).
- 532 40. Wang, Y. *et al.* Common 5p15.33 and 6p21.33 variants influence lung cancer risk. *Nat Genet* **40**,  
533 1407-9 (2008).
- 534 41. Shi, J. *et al.* Inherited variation at chromosome 12p13.33, including RAD52, influences the risk of  
535 squamous cell lung carcinoma. *Cancer Discov* **2**, 131-9 (2012).
- 536 42. Timofeeva, M.N. *et al.* Influence of common genetic variation on lung cancer risk: meta-analysis  
537 of 14 900 cases and 29 485 controls. *Hum Mol Genet* **21**, 4980-95 (2012).
- 538 43. Anderson, M.J. A new method for non-parametric multivariate analysis of variance. *Austral*  
539 *Ecology* **26**: , 32-46. (2001).
- 540 44. Zhao, N. *et al.* Testing in Microbiome-Profiling Studies with MiRKAT, the Microbiome  
541 Regression-Based Kernel Association Test. *Am J Hum Genet* **96**, 797-807 (2015).
- 542 45. Leone, V.A., Cham, C.M. & Chang, E.B. Diet, gut microbes, and genetics in immune function: can  
543 we leverage our current knowledge to achieve better outcomes in inflammatory bowel diseases?  
544 *Current Opinion in Immunology* **31**, 16-23 (2014).
- 545 46. Huang, H., Vangay, P., McKinlay, C.E. & Knights, D. Multi-omics analysis of inflammatory bowel  
546 disease. *Immunol Lett* **162**, 62-8 (2014).
- 547 47. Troncone, R. & Discepolo, V. Celiac disease and autoimmunity. *J Pediatr Gastroenterol Nutr* **59**  
548 **Suppl 1**, S9-S11 (2014).
- 549 48. Yeoh, N., Burton, J.P., Suppiah, P., Reid, G. & Stebbings, S. The role of the microbiome in  
550 rheumatic diseases. *Curr Rheumatol Rep* **15**, 314 (2013).
- 551 49. Sparks, J.A. & Costenbader, K.H. Genetics, environment, and gene-environment interactions in  
552 the development of systemic rheumatic diseases. *Rheum Dis Clin North Am* **40**, 637-57 (2014).
- 553 50. Smith, J.A. Update on ankylosing spondylitis: current concepts in pathogenesis. *Curr Allergy*  
554 *Asthma Rep* **15**, 489 (2015).
- 555 51. Nielsen, D.S., Krych, L., Buschard, K., Hansen, C.H. & Hansen, A.K. Beyond genetics. Influence of  
556 dietary factors and gut microbiota on type 1 diabetes. *FEBS Lett* **588**, 4234-43 (2014).
- 557 52. Birt, D.F. & Phillips, G.J. Diet, genes, and microbes: complexities of colon cancer prevention.  
558 *Toxicol Pathol* **42**, 182-8 (2014).
- 559 53. Marietta, E., Rishi, A. & Taneja, V. Immunogenetic control of the intestinal microbiota.  
560 *Immunology* **145**, 313-22 (2015).

561

562



563 Table 1: Type-I error rates estimated based on  $10^8$  simulations. Minor allele frequency = 20%.  
 564 Simulations were based on the weighted UniFrac distance matrix of the gut microbiome data from the  
 565 American Gut Project. Reported are the type-I error inflation factor. A value greater than 1 indicates an  
 566 inflated type-I error.

567

|                                    | N    | $Z_M$              |           |           | $Z_I$     |           |           | $Q$       |           |           |
|------------------------------------|------|--------------------|-----------|-----------|-----------|-----------|-----------|-----------|-----------|-----------|
|                                    |      | $\alpha = 10^{-3}$ | $10^{-5}$ | $10^{-7}$ | $10^{-3}$ | $10^{-5}$ | $10^{-7}$ | $10^{-3}$ | $10^{-5}$ | $10^{-7}$ |
| asymptotic approximation           | 100  | 5.5                | 51.6      | 610.0     | 4.7       | 36.1      | 342.8     | 7.3       | 80.9      | 1148.0    |
|                                    | 200  | 3.7                | 23.0      | 187.3     | 3.1       | 15.8      | 105.5     | 4.6       | 33.0      | 316.7     |
|                                    | 500  | 2.4                | 9.4       | 45.2      | 2.1       | 6.7       | 25.5      | 2.8       | 11.9      | 64.1      |
|                                    | 1000 | 2.0                | 5.7       | 21.3      | 1.8       | 4.4       | 14.0      | 2.2       | 6.9       | 28.5      |
| adjusted for skewness and kurtosis | 100  | 1.0                | 1.2       | 0.7       | 1.0       | 1.1       | 0.6       | 1.0       | 1.5       | 2.0       |
|                                    | 200  | 1.0                | 1.1       | 1.0       | 1.0       | 1.1       | 0.7       | 0.9       | 1.3       | 1.8       |
|                                    | 500  | 1.0                | 1.1       | 1.3       | 1.0       | 1.0       | 0.9       | 0.9       | 1.0       | 1.7       |
|                                    | 1000 | 1.0                | 1.0       | 1.2       | 1.0       | 1.0       | 0.8       | 0.9       | 1.0       | 1.1       |

568

569

570

571

572 Table 2: Association P-values between lung cancer risk SNPs and microbiome composition in the  
 573 EAGLE data.

| SNP                 | Chr     | Annotated genes   | unweighted UniFrac | weighted UniFrac |
|---------------------|---------|-------------------|--------------------|------------------|
| rs2036534           | 15q25.1 | <i>CHRNA3/4/5</i> | 0.425              | 0.167            |
| rs1051730           | 15q25.1 | <i>CHRNA3/4/5</i> | 0.020              | 0.401            |
| rs2736100           | 5p15.33 | <i>TERT</i>       | 0.089              | 0.267            |
| rs401681            | 5p15.33 | <i>CLPTMIL</i>    | 0.056              | 0.005            |
| rs6489769           | 12p13.3 | <i>RAD52</i>      | 0.197              | 0.329            |
| rs1333040           | 9p21.3  | <i>CDKN2A/B</i>   | 0.249              | 0.224            |
| <i>Overall test</i> |         |                   | 0.0032             | 0.011            |

574

575 **Figure 1** Microbiome distances are positively correlated with genetic distances at an associated SNP.

576 **Figure 2** Define the joint test for testing  $H_0: \beta_M = \beta_I = 0$  vs.  $\beta_M > 0$  or  $\beta_I > 0$ . We assume that

577  $Z_M \sim N(0,1)$ ,  $Z_I \sim N(0,1)$  and  $cor(Z_M, Z_I) = \rho$  under  $H_0$ . Details are in **Appendix C**.

578 **Figure 3** Correcting tail probabilities for skewness and kurtosis. (A) The standard normal distribution

579  $N(0,1)$  and an approximately normal distribution with positive skewness. The skewness has big impact

580 when calculating the tail probability  $P(Z > b)$  for a large value of  $b$ . (B) Numerical evaluation of tail

581 probability approximation for  $Z_M$ . We used the unweighted UniFrac distance matrix of 500 samples from

582 the American Gut Project (AGP). For each value of  $b(> 0)$ , we calculated P-values  $P(Z_M > b)$  based on

583  $N(0,1)$ , skewness correction, both skewness and kurtosis correction, and  $10^8$  simulations. (C) Skewness

584 depends on MAF of SNPs and the sample size of the study, calculated based on the weighted UniFrac

585 distance matrix in AGP data. (D) Kurtosis depends on MAF of SNPs and the sample size, calculated

586 based on the weighted UniFrac distance matrix in AGP data.

587 **Figure 4** Computation time for a microbiome GWAS with 500,000 SNPs. “Main”: computation time for

588 testing main effect only. “All”: computation time for testing main effect, interaction and the joint null

589 hypothesis  $H_0: \beta_M = 0, \beta_I = 0$ .

590 **Figure 5** Results of analyzing the microbiome GWAS data of 147 adjacent normal lung tissues in the

591 EAGLE study. (A) Skewness and kurtosis for the main effect test using the unweighted and the weighted

592 UniFrac distance matrices. (B) Quantile-quantile (QQ) plot for association P-values using the unweighted

593 UniFrac distance matrix. “Adjusted”: P-values were corrected for skewness and kurtosis. “Unadjusted”:

594 P-values were approximated based on the asymptotic distribution  $N(0,1)$ . (C) Quantile-quantile (QQ)

595 plot for association P-values using the weighted UniFrac distance matrix. (D) Manhattan plots based on

596 the unweighted or the weighted UniFrac distance matrices. (E) Box plots for the top nine loci in

597 microbiome GWAS analysis. Subject pairs are classified into three groups according to the genetic

598 distance  $|g_i - g_j|$  at the SNP. The y-coordinate is the microbiome distance.

Figure 1

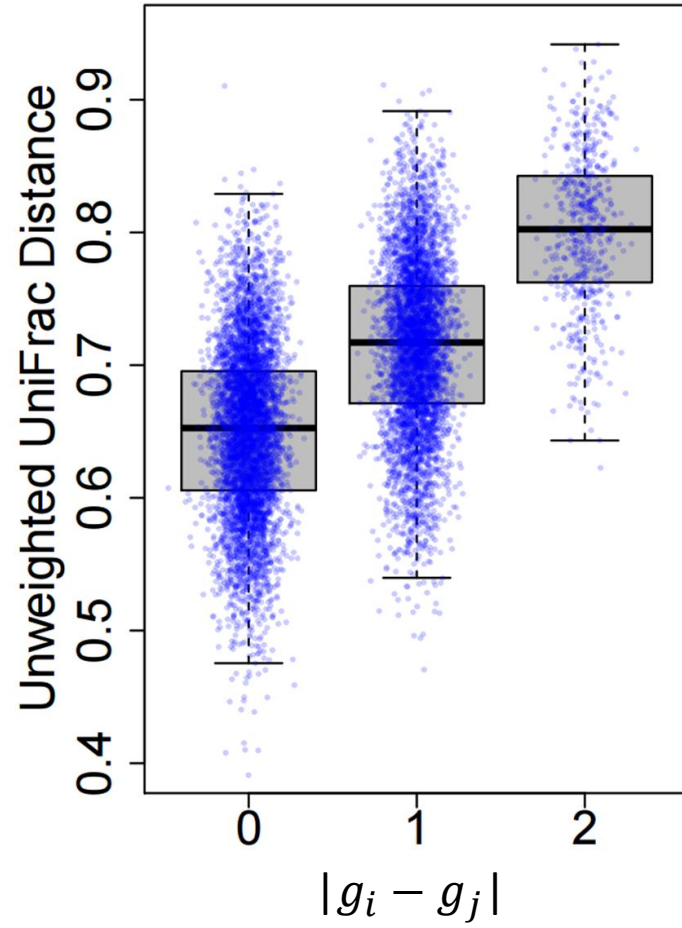

Figure 2

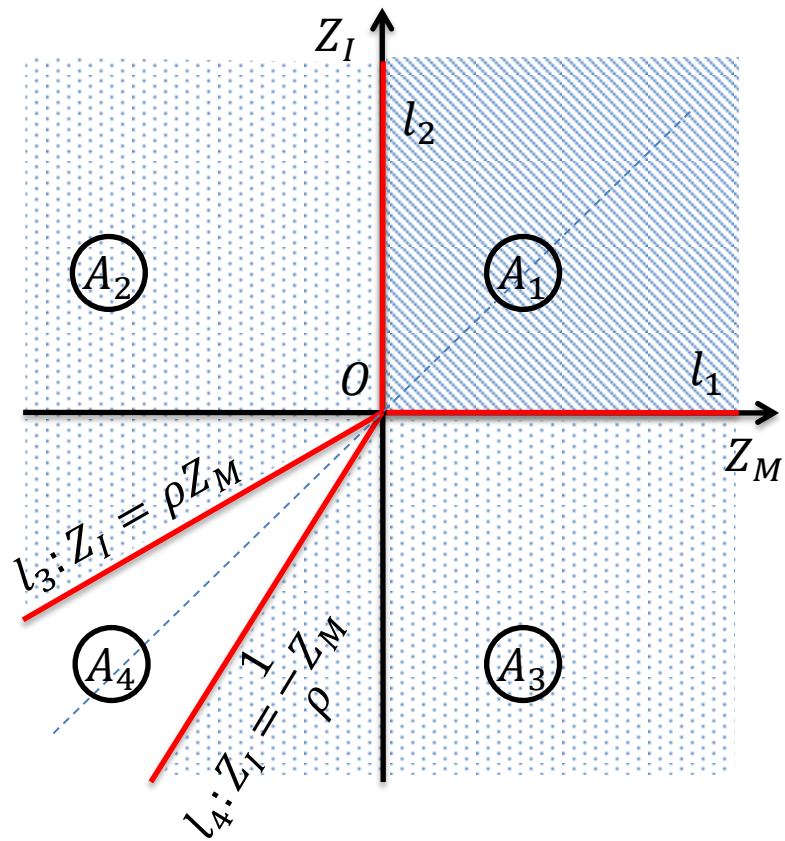

**A**

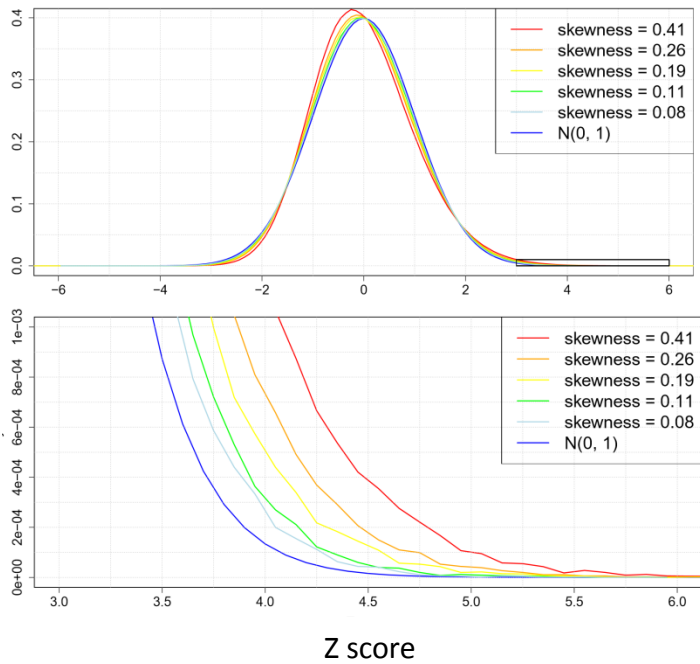

**B**

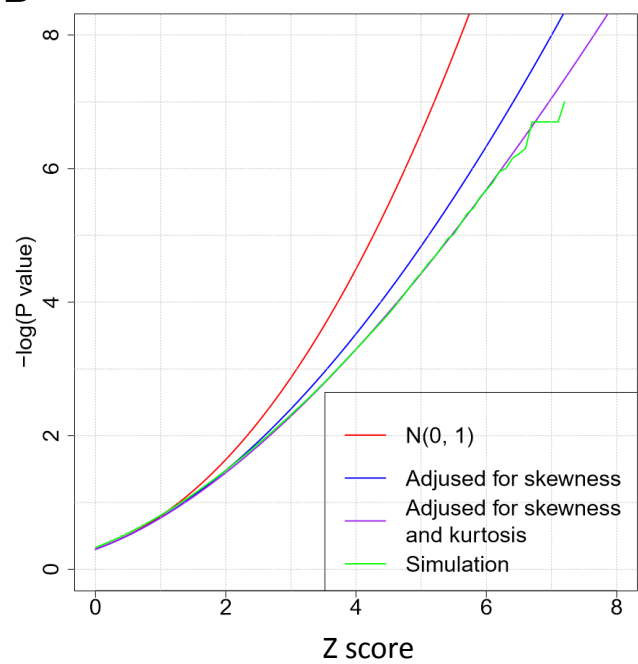

**C**

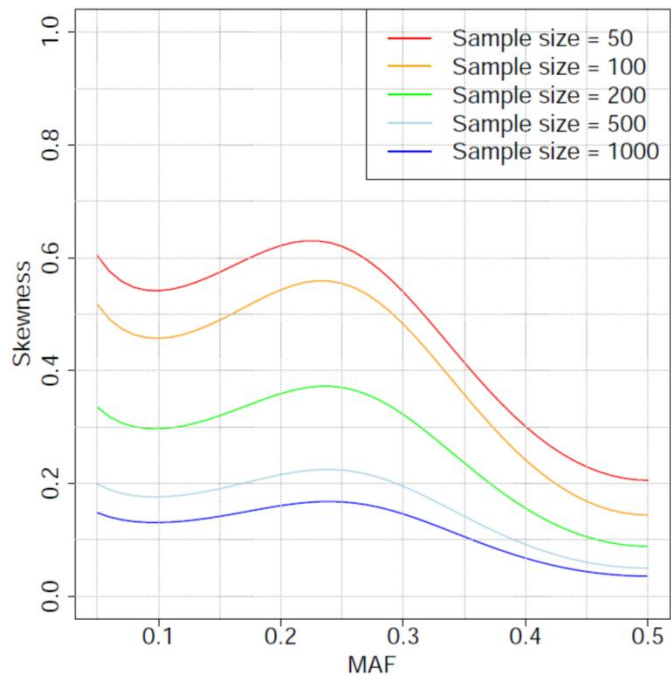

**D**

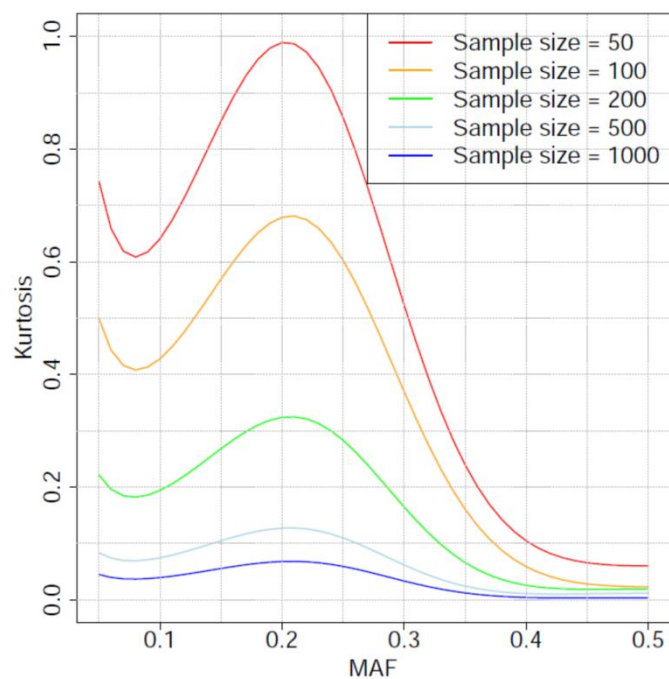

Figure 4

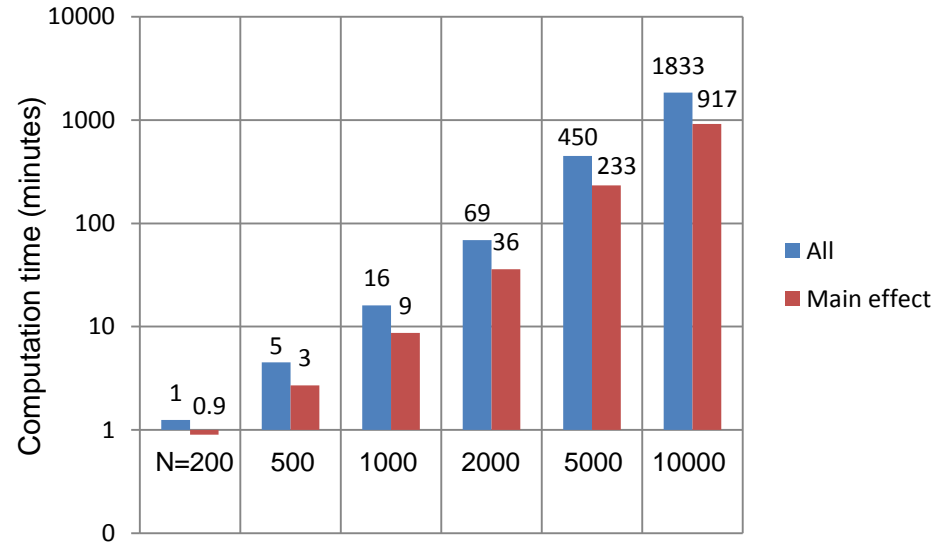

Source: http://biorxiv.org/content/10.1101/031187v1.full.pdf
